# Supplementary material for: Quasiparticle energies and significant exciton effects of monolayered blue arsenic phosphorus conformers
Source: Royal Society of Chemistry journal article supplement (doi:10.1039/d1cp02330f), 2021-01-01
Supplement: d1cp02330f1.pdf [file d1cp02330f1.pdf]

## Supporting Information

### Quasiparticle energies and significant exciton effects of monolayered blue arsenic phosphorus conformers

Huiyan Zhao,<sup>a</sup> Qian Wang,<sup>a</sup> Baonan Jia,<sup>a</sup> Lihong Han,<sup>a</sup> Wen Chen,<sup>b</sup> Jinbo Hao,<sup>b</sup> Liyuan Wu<sup>\*c</sup>, Pengfei Lu<sup>\*a</sup> and Pengfei Guan<sup>\*d</sup>

<sup>a</sup> State Key Laboratory of Information Photonics and Optical Communications, School of Electronic Engineering, Beijing University of Posts and Telecommunications, Beijing 100876, P. R. China

<sup>b</sup> School of Science, Xi'an University of Architecture and Technology, Xi'an 710055, P. R. China

<sup>c</sup> CAS Key Laboratory for Biomedical Effects of Nanomaterials and Nanosafety, Institute of High Energy Physics, Chinese Academy of Sciences, Beijing 100049, P. R. China

<sup>d</sup> Beijing Computational Science Research Center, Beijing 100193, P. R. China

Email: wuly2018@gmail.com; photon.bupt@gmail.com; pguan@csrc.ac.cn

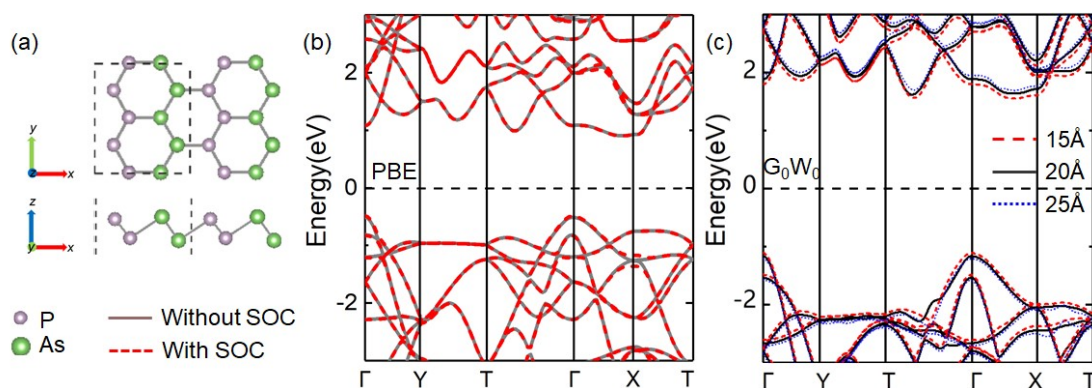

Figure S1 (a) The top and side views of the optimized  $\beta_1$ -AsP. (b) The band structures of  $\beta_1$ -AsP by PBE without SOC (the gray solid lines) and with SOC (the red dotted lines). Taking into account the SOC effect, the bands in the X point show a small spin splitting. The calculated splitting energy of the VBM is about 191 meV. The influence of SOC on the energy band can be ignored. (c) The band structures of  $\beta_1$ -AsP by  $G_0W_0$  with the vacuum layer of 15 Å (the dashed lines), 20 Å (the black solid lines), and 25 Å (the blue dotted lines) with  $7 \times 6 \times 1$  k-grid. The direct band gaps with the vacuum layer of 15 Å, 20 Å, and 25 Å increase, 2.92, 3.05, and 3.16 eV, respectively. The calculated gaps change between them no more than 250 meV. In our work, we used a vacuum layer of 20 Å in the perpendicular (z) direction to avoid spurious interaction between layers.

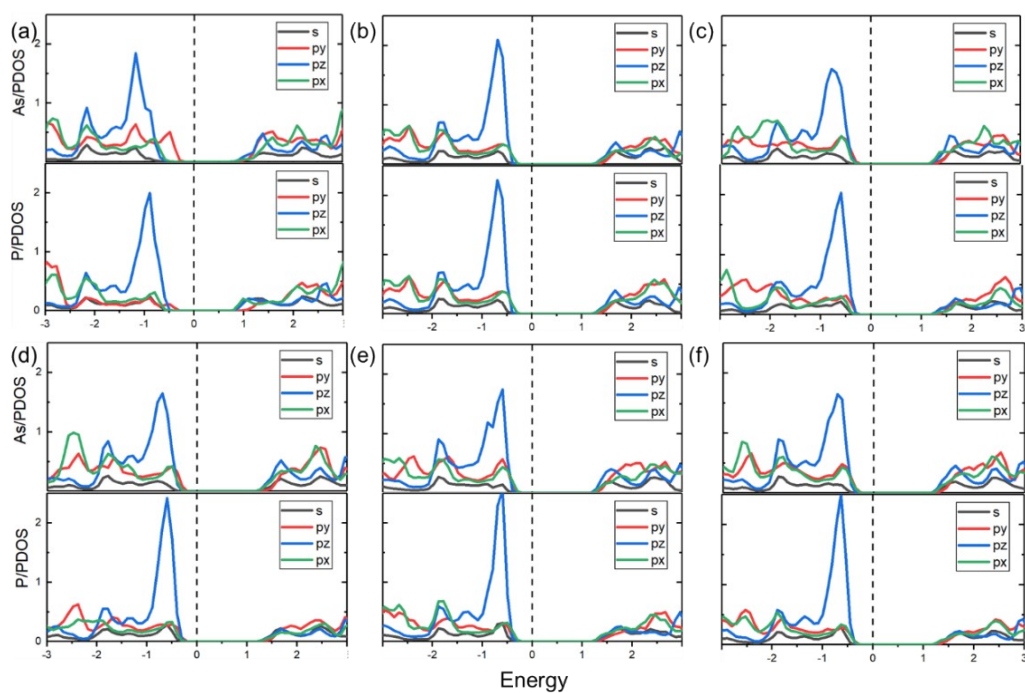

Figure S2 The PDOS with PBE potential for As atoms and P atoms of (a)  $\beta_1$ -AsP, (b)  $\beta_2$ -AsP, (c)  $\beta_3$ -AsP, (d)  $\beta_4$ -AsP, (e)  $\beta_5$ -AsP, and (f)  $\beta_6$ -AsP. Black, red, blue, green lines indicate the  $s$ ,  $p_y$ ,  $p_z$ ,  $p_x$  orbitals for As or P atoms.
